1 **Article Summary Line:** SARS-CoV-2 in naturally infected cats present a shorter shedding  
2 pattern compared to their owners.

3 **Running Title:** SARS-CoV-2 shedding in naturally infected cats

4 **Keywords:** SARS-CoV-2, natural infection, domestic cats, households, viral shedding.

5

6 **A household case evidences shorter shedding of SARS-CoV-2 in naturally infected cats**  
7 **compared to their human owners.**

8 **Authors:** Víctor Neira\*<sup>1</sup>, Bárbara Brito, Belén Agüero, Felipe Berrios, Valentina Valdés,  
9 Alberto Gutierrez, Naomi Ariyama, Patricio Espinoza, Patricio Retamal, Edward C. Holmes,  
10 Ana S. Gonzalez-Reiche, Zenab Khan, Adriana van de Guchte, Jayeeta Dutta, Lisa Miorin,  
11 Thomas Kehrer, Nicolás Galarce, Leonardo I. Almonacid, Jorge Levican, Harm van Bakel<sup>1</sup>,  
12 Adolfo García-Sastre<sup>1</sup>, Rafael A. Medina<sup>1</sup>

13 \*Corresponding author

14 <sup>1</sup>Seniors authors

15 **Affiliations:**

16 Departamento de Medicina Preventiva Animal, Facultad de Ciencias Veterinarias y Pecuarias,  
17 Universidad de Chile, Santiago, Chile. (V. Neira, B. Agüero, F. Berrios, V. Valdés, A. Gutierrez,  
18 N. Ariyama, P. Espinoza, P. Retamal, N. Galarce)

19 The itthree institute - University of Technology Sydney, Sydney, Australia. (B. Brito)

20 Marie Bashir Institute for Infectious Diseases and Biosecurity, School of Life and Environmental  
21 Sciences and School of Medical Sciences, The University of Sydney, Sydney, Australia. (E.C.  
22 Holmes)

23 Department of Genetics and Genomic Sciences, Icahn School of Medicine at Mount Sinai, New  
24 York, New York, USA. (A. Gonzalez-Reiche, Z. Khan, A.van de Guchte, J. Dutta, H.van Bakel)

25 Department of Microbiology, Icahn School of Medicine at Mount Sinai, New York, New York,  
26 USA. (L. Miorin, T. Kehrer, A. García-Sastre, R.A. Medina)

27 Global Health and Emerging Pathogens Institute, Icahn School of Medicine at Mount Sinai, New  
28 York, New York, USA. (L. Miorin, A. García-Sastre)

29 Departamento de Enfermedades Infecciosas e Inmunología Pediátrica, Escuela de Medicina,  
30 Pontificia Universidad Católica de Chile, Santiago, Chile. (L.I. Almonacid, J. Levican, R.A.  
31 Medina)

32 Icahn Institute for Data Science and Genomic Technology, Icahn School of Medicine at Mount  
33 Sinai, New York, New York, USA. (H.van Bakel)

34 Department of Medicine, Division of Infectious Diseases, Icahn School of Medicine at Mount  
35 Sinai, New York, New York, USA. (A. García-Sastre)

36 The Tisch Cancer Institute, Icahn School of Medicine at Mount Sinai, New York, New York,  
37 USA (A. García-Sastre)

38

39

## 40 **Abstract**

41 Severe acute respiratory syndrome coronavirus 2 (SARS-CoV-2) has been detected in  
42 domestic and wild cats. However, little is known about natural viral infections of domestic cats,  
43 although their importance for modeling disease spread, informing strategies for managing  
44 positive human-animal relationships and disease prevention. Here, we describe the SARS-CoV-2  
45 infection in a household of two human adults and sibling cats (one male and two females) using  
46 real-time RT-PCR, an ELISA test, viral sequencing, and virus isolation. On May 2020, the cat-  
47 owners tested positive for SARS-CoV-2. Two days later, the male cat showed mild respiratory  
48 symptoms and tested positive. Four days after the male cat, the two female cats became positive,  
49 asymptotically. Also, one human and one cat showed antibodies against SARS-CoV-2. All  
50 cats excreted detectable SARS-CoV-2 RNA for a shorter duration than humans and viral  
51 sequences analysis confirmed human-to-cat transmission. We could not determine if cat-to-cat  
52 transmission also occurred.

## 53 **Introduction**

54 In December 2019, severe acute respiratory syndrome-related coronavirus 2 (SARS-  
55 CoV-2) emerged as a new human pathogen in Wuhan, Hubei province, China, likely due to a  
56 cross-species transmission event between humans and an unknown animal reservoir(1). Since  
57 then, SARS-CoV-2 has been efficiently transmitted between humans, causing a pandemic with  
58 devastating consequences for human health, societies and economies globally(2).

59 There is also now a growing body of data indicating that the virus is able to infect  
60 companion animals and other animal species(1,3). To date, naturally occurring cases officially  
61 reported to the World Organization for Animal Health (OIE) and to the United States

62 Department of Agriculture include 14 cases in dogs in the US, Hong Kong, and Japan, and 25  
63 cases in cats in the US, Hong Kong, France, Belgium, Germany, Russia, Spain and the UK(4).  
64 Additionally, cases in farmed mink from the Netherlands, Spain, US, and Denmark, as well as  
65 tigers and lions from a New York zoo in the US, have also been reported(4–6). Dogs that have  
66 been experimentally infected show low viral loads and do not observably transmit SARS-CoV-2  
67 between dogs(1). Among domestic animals, natural infection and experimental data suggest that  
68 felids and mustelids are more susceptible to SARS-CoV-2 infection than canines(4,7,8).  
69 Companion animals are considered as protective factors against loneliness and as a source of  
70 social and emotional support for people during difficult situations or disease(9–11).

71           Understanding how and when SARS-CoV-2 is transmitted in domestic animals is critical  
72 for informing decisions for control and prevention of infections. Previous studies of SARS-CoV-  
73 2 transmission in cats have been in laboratory settings. Cats experimentally infected with SARS-  
74 CoV-2 can efficiently replicate and transmit the virus to other cats housed in adjacent cages,  
75 suggesting respiratory transmission. In these species, the virus replicates mostly in the upper  
76 airways. Juvenile compared to sub-adult cats have more severe outcomes(7,12). However,  
77 nothing is known about patterns of viral transmission under natural conditions in households in  
78 which humans inhabits with companion cats. Key questions involve determining the dynamics of  
79 virus infection including the duration of viral excretion.

80           Beginning in May 2020, we conducted active surveillance in Santiago City, Chile, to  
81 determine the potential infection of companion animals in households in which the humans had  
82 tested positive to SARS-CoV-2. At that time, Santiago was experiencing daily reports of >3000  
83 SARS-CoV-2 human cases. From a survey of 12 households, we found two containing  
84 companion animals that tested positive for SARS-CoV-2. One household had two cats, one of

85 which presented antibodies to SARS-CoV-2. The other household was home to three 10-year-old  
86 sibling cats: all three were identified as having a SARS-CoV-2-positive infection. Herein, we  
87 describe a case-study of naturally occurring SARS-CoV-2 infection based on the three-cat  
88 household that also included two human adults aged in their 30s and 60s years old who were  
89 both positive to SARS-CoV-2. The data generated provide a better understanding of infection  
90 dynamics in cats, one of the most important SARS-CoV-2 animal natural hosts documented to  
91 date.

## 92 **Methods**

### 93 **Case description and specimen collection**

94 Between May and September 2020, we collected animal companion samples from 12  
95 households with confirmed human SARS-CoV-2 cases in Santiago City, Chile. These samples  
96 were from 17 cats and 10 dogs (Supplementary information). Of the 12 households sampled, two  
97 presented animals positive for SARS-CoV-2. In one household, one of two cats had SARS-CoV-  
98 2 antibodies measured by ELISA. In the other household, three out of three cats were positive for  
99 SARS-CoV-2 by rtRT-PCR. We followed the second-mentioned household for 40 days to  
100 examine SARS-CoV-2 infection dynamics. This case is described below.

101 On May 2020 a COVID-19 diagnosis was confirmed by SARS-CoV-2 rtRT-PCR for the  
102 humans in the studied household – a male of around 30 years old and a female of around 60  
103 years old. The residents owned three 10-years-old sibling cats, 1 male (cat 1) and 2 females (cat  
104 2 & 3). Of the three cats, cat 1 had the closest contact with the humans, sharing human 1's bed.  
105 Humans and cats were recruited to this case study. From humans, nasal swabs, sputum, and fresh  
106 fecal samples were collected at intervals of 4 to 7 days. From cats, nasal swabs and fresh fecal

107 samples were collected at intervals of 1 to 3 days until rtRT-PCR was negative for SARS-CoV-2.  
108 At day 0 (first sampling date) a nasal swab was collected from cat 1 and fresh feces were  
109 collected from all 3 cats. Cat 1 tested positive for SARS-CoV-2 by rtRT-PCR in both nasal  
110 (Ct=31) and fecal sample (Ct=33), and cat 2 and 3 tested negative. In cats, at the last sampling,  
111 serum samples were also collected. Nasal samples were collected using flocculated swabs; fresh  
112 feces were stored in ziplock bags(13–15) and deposited in viral transport media.

113 The owners provided written consents at the time of the sample collection. For all the  
114 study, human sampling was performed by nurses and animal sampling was performed by  
115 veterinarians. Humans samples were tested at the Molecular Virology Laboratory, Pontificia  
116 Universidad Católica de Chile and animal samples were tested at the Animal Virology  
117 Laboratory, Universidad de Chile, La Pintana, Chile. The animal study was reviewed and  
118 approved by the Institutional Animal Care and Use Committee of Universidad de Chile, under  
119 protocol number 20370–VET–UCH, Biosafety Committee of Facultad de Ciencias Veterinarias  
120 y Pecuarias, Universidad de Chile under protocol number 161 and the human study was  
121 reviewed and approved under protocol 16-066 Scientific Ethical Committee on Health Sciences  
122 of Pontifical Universidad Católica de Chile.

### 123 **Real time RT-PCR**

124 RNA from the samples was extracted using TRIzol™ Reagent (Invitrogen™, Carlsbad,  
125 CA, USA) following the instructions recommended by the manufacturer and eluted into 50 µL.  
126 The extracted RNA was subjected to rtRT-PCR to amplify a portion of ORF1b SARS-CoV-  
127 2(16). This PCR was previously validated at both laboratories independently, and is one of the

128 RT-PCRs recommended by the WHO(17) to diagnose COVID-19. Positive and negative controls  
129 for PCR and extraction were included in each run.

### 130 **Serological testing**

131 Serum samples were tested via a commercial ELISA test for SARS-CoV-2 antibody  
132 detection, the ID SCREEN® SARS-COV-2 Double Antigen Multi Species(18) (IDVET,  
133 Grabels, FRANCE).

### 134 **Viral isolation**

135 Viral isolation was attempted in Vero E6 cells at Icahn School of Medicine at Mount  
136 Sinai, New York. Cells were cultured in minimum essential medium eagle 10% fetal bovine  
137 serum, 100 IU/mL penicillin, and 100 µg/mL streptomycin. Cells were seeded in 12-well culture  
138 plates and cultured at 37°C with 5% CO<sub>2</sub> for 24-48h. Cells were rinsed and inoculated with 300  
139 µl of the direct sample and 1:10 and 1:100 dilutions. Mock-inoculated cells were used as  
140 negative controls. Cells were incubated at 37°C with 5% CO<sub>2</sub> and monitored daily for cytopathic  
141 effect (CPE) for five days. Cell cultures with no CPE were frozen, thawed, and subjected to three  
142 blind passages with inoculation of fresh Vero E6 cell cultures with the lysates as described  
143 above.

### 144 **Viral sequencing**

145 A selection of 25 rtRT-PCR positive specimens from humans and cats was submitted to  
146 the Icahn Institute for Data Science and Genomic Technology, Icahn School of Medicine at  
147 Mount Sinai, New York, NY for whole genome sequencing. Selection criteria were based on the  
148 cycle threshold values and inclusion of all cats and humans. The whole genome was amplified

149 with a modified version of the ARTIC Consortium protocol(19) with custom tiling primers as  
150 previously described(20). After amplification, viral sequencing was attempted on 12 positive  
151 samples, four human and eight from cat. Purified amplicons were used for library preparation  
152 with Nextera XT DNA Sample preparation Kit (Illumina, FC-131-1096) and sequenced on an  
153 Illumina MiSeq instrument (2x150 nt). SARS-CoV-2 genomes were assembled and annotated  
154 using a reference-based analysis pipeline as previously described(20).

### 155 **Sequence data analysis**

156 Six SARS-CoV-2 genome sequences were analyzed. These sequences were obtained  
157 from the clinical nasopharyngeal specimens of two humans that reside in the household: Human  
158 1 (hCoV-19/Chile/Santiago/op31d5/2020; Human 1) and Human 2 (hCoV-  
159 19/Chile/Santiago/op32d10/2020; (Human 2), and four sequences from their cats - two of these  
160 were collected from nasal swabs of cat 2, and a nasal sample from cat 3. Completeness of  
161 sequencing coverage and mutations were estimated by comparing the alignment with the  
162 reference sequence Wuhan-Hu-1 (GenBank accession NC\_045512.2). Sequences were aligned to  
163 a set of reference SARS-CoV-2 sequences including all Chilean sequences submitted to  
164 GISAID(20) (n=167), sequences with highest similarity deposited on GenBank identified using  
165 BLAST(21) (n=337), and a total of 1000 sequences randomly selected from the GISAID  
166 repository using FastaUtils package in R(22). The sequences were aligned using MAFFT v7.402  
167 using CIPRESS computational resources(23). The aligned sequences were visualized in AliView  
168 v1.26(24). Duplicate sequences were removed and non-coding regions, 5' and 3' UTR were  
169 trimmed. A phylogeny was estimated using the maximum likelihood method available in IQ-  
170 TREE v1.6.7 employing the GTR+F+I+ $\Gamma_4$  model of nucleotide substitution with 1000 bootstrap



171 replications. The phylogenetic tree was visualized using Figtree. SARS-CoV-2 lineages were  
172 identified using the Pangolin COVID-19 Lineage Assigner web application(25).

## 173 **Results**

### 174 **Naturally infected cats excreted SARS-CoV-2 RNA in a different pattern to that of humans**

175 To determine the duration and dynamics of SARS-Cov-2 RNA detection in cat excretions  
176 under natural conditions, we assessed, by real time RT-PCR (rtRT-PCR), the presence of SARS-  
177 CoV-2 RNA in nasal and fecal samples from three companion cats over a 40-day time period.  
178 The cats acquired the SARS-CoV-2 infection naturally (rather than experimentally) and were  
179 residing in their usual household during the sampling period. Cat 2 had a pre-existing chronic  
180 rhinosinusitis as comorbidity. The household included two humans, and both were confirmed  
181 positive for SARS-CoV-2 before sampling of the cats commenced. Nasal, sputum, and fecal  
182 samples were taken from the humans and also assessed by rtRT-PCR for the presence of SARS-  
183 CoV-2 RNA over the time period in which the cats were sampled. All three cats had detectable  
184 viral RNA in both nasal swabs and fecal samples, with cycle threshold (Ct) values over 21.9  
185 (Figure 1). In both humans, nasal and sputum samples showed Ct values ranging from 26 to 40.  
186 However, all human fecal samples showed negative rtRT-PCR results. The duration for which  
187 SARS-CoV-2 RNA could be detected in cat samples varied between the three cats sampled (5  
188 days for cat 1, 8 days for cat 3, 17 for cat 2). Even at the extreme end of the range, the duration  
189 of detection was considerably shorter than the human samples. SARS-CoV-2 RNA was detected  
190 in the human samples up to 25 days after the first RNA detection. The dynamics of detectable  
191 viral RNA in the cat samples were more erratic compared to that for detectable viral RNA in

192 humans from the same household. For example, a female cat (cat 2) presented an intermittent  
193 RNA detection for at least 17 days (Supplementary information).

194 To assess the infection of the cats and humans, we made clinical observations for  
195 symptoms of SARS-CoV-2 infection and performed serological testing. Cat 1 presented with  
196 mild clinical signs including dullness, lethargy, and coughing without fever. Cats 2 and 3 were  
197 asymptomatic. On the last sampling on day 33 after first detection on cats, cat 2 tested positive  
198 for SARS-CoV-2 antibodies by ELISA. Both humans displayed COVID-19 symptoms including  
199 fever, lethargy, and coughing. However, the female human was more clinically affected and was  
200 the only human that tested positive for SARS-CoV-2 antibodies by ELISA starting at day 4 after  
201 detection on cats.

202 Multiple attempts to isolate the virus from low Ct (high levels of SARS-CoV-2 RNA;  
203 21.9 -24.1) samples were made without success.

#### 204 **Human and cat origin SARS-CoV-2 genome sequences are identical**

205 Of the specimens sent for genome sequencing one had coverage of 69.3% (human 2, day  
206 10, nasopharyngeal) and five had a genome coverage >98% (three nasal swabs from cat 2, one  
207 nasal swab from cat 3, and one nasopharyngeal from human 1) (Appendix Figure). The  
208 remaining sequenced samples had a coverage <50% and were not included in the analyses.  
209 Sequences were deposited in GenBank (Accession numbers MW064259- MW064264). Using  
210 the Pangolin tool(25) all sequences were assigned to lineage B.1.1, a major European lineage  
211 that was exported to the rest of the world from Europe. Of the 178 Chilean sequences included in  
212 this analysis (from GISAID and GenBank), 34 belong to this lineage.

213 We conducted a phylogenetic analysis to investigate any relationship between the SARS-  
214 CoV-2 RNA excreted by different cats and humans within the household. All six sequences  
215 obtained fell into a monophyletic group defined by a C25344T (S1261F/Spike) nucleotide  
216 substitution (Figure 2). Notably, there were no nucleotide differences between the viral  
217 sequences obtained from cats and one of the household humans (hCoV-  
218 19/Chile/Santiago/op31d5/2020; Human). The viral sequence from the female human (hCoV-  
219 19/Chile/Santiago/op32d10/2020; (Human 2) contained two polymorphisms compared to the rest  
220 of the sequences (C11511T/T3749I/nsp6) and (C13740T/syn/RdRp) but fell in the same group.  
221 An epidemiologically unrelated Chilean SARS-CoV-2 sequence (GISAID accession number  
222 EPI\_ISL\_468748) collected in the same city on April was also grouped within this cluster of 6  
223 sequences.

## 224 **Discussion**

225 Several reports have confirmed the susceptibility of cats to SARS-CoV-2 infection in  
226 natural conditions and viral transmissibility between cats under experimental  
227 conditions(12,26,27). However, these do not provide insight into the infection dynamics of cats  
228 in natural settings. This is the first report to describe the RNA excretion profiles of SARS-CoV-2  
229 in naturally infected cats. The viral RNA in samples may indirectly denote SARS-CoV-2 viral  
230 excretion and can serve, with limitations, as a proxy for active viral replication. Indeed, SARS-  
231 CoV-2 antibodies detected by ELISA confirmed the infection in cat 2. Our household study thus  
232 provides preliminary guidance for managing the care and quarantine of cats in households in  
233 which SARS-CoV-2 is present.

234           The results, particularly the similarity of genome sequences depicted in the phylogenetic  
235 analysis, strongly support the idea that SARS-CoV-2 can be transmitted between humans and  
236 cats living in the same household. It is suspected that the humans were infected following  
237 exposure to SARS-CoV-2-positive neighbors days before. We think it likely that cat 1 was the  
238 first infected of the three cats because this animal had closer contact than the other two cats with  
239 human 1 (male), sharing his bed. This is supported by our observation that viral RNA from  
240 human 1 and the cats had identical sequences whereas the female human's viral RNA differed by  
241 two polymorphisms. Transmission between humans and cats in the same household accords with  
242 the literature on viral infections in animals. Several animal species are permissive for virus  
243 infection and replication in the upper respiratory tract(1) and it has been suggested that the  
244 species barrier of SARS-CoV-2 might be weak since the ACE2 host receptor may allow virus  
245 attachment even after some amino acid changes(28). SARS-CoV-2 can be transmitted to animals  
246 by direct or indirect contact with contaminated surfaces or excretions(29). For cats(1) and  
247 ferrets(30) respiratory transmission can be mediated by droplets or aerosols. Our findings of  
248 positive SARS-CoV-2 RNA detection in nasal samples (ranging from 5-17 days) and in fecal  
249 samples (ranging from 4-10 days) in all three cats, further support recommendations for avoiding  
250 close contact with companion animals when an infection is suspected in owners or family  
251 members.

252           Whether all cats in the study household were infected from humans, or whether some  
253 transmission occurred between animals, cannot be determined. Nevertheless, the possibility of  
254 some transmission between cats in the household is suggested by the 4-day delay in cats 2 and 3  
255 testing positive to SARS-CoV-2 by rtRT-PCR compared to cat 1. All three cats had direct  
256 contact with each other. Transmission between cats in the household would be consistent with

257 the findings of Shi et al. (2020) who studied transmission between cats in an experimental  
258 setting<sup>7</sup>. In that study, inoculated and infected sub-adult cats were placed next to susceptible cats  
259 in an adjacent cage (non-direct contact). Of the three replicates, one exposed cat gave rise to a  
260 positive rtRT-PCR on the 5th day post-exposure(7). To date, however, we have only identified  
261 three rtRT-PCR-positive cats, with one of these also positive by ELISA, and one cat of another  
262 household similarly positive by ELISA. Consequently, it is likely that cat-to-cat transmission  
263 events are not as common as human-to-human transmission.

264 In summary, at present, there is insufficient data to identify and prioritize the drivers for  
265 the infection of companion animals(31). Reported cases in animals correspond to independent  
266 and sporadic events. The findings presented here show that cats seemingly have different and  
267 shorter patterns of excretion for SARS-CoV-2 RNA compared to humans. These results  
268 highlight a need for large-scale epidemiological analysis of SARS-CoV-2 infection dynamics to  
269 support the establishment of preventive measures in real-life human-animal relationships.

## 270 **Acknowledgments**

271 This study was partly funded by the Programa Fondecyt de Iniciación N° 11170877 and  
272 Proyecto FIV to VN; the Programa Beca Magister Nacional de ANID N°22190312 to NA. We  
273 thank Randy Albrecht for support with the BSL3 facility and procedures at the ISMMS, and  
274 Richard Cadagan for technical assistance. These studies were partly supported by CRIP (Center  
275 for Research for Influenza Pathogenesis), a NIAID supported Center of Excellence for Influenza  
276 Research and Surveillance (CEIRS, contract # HHSN272201400008C) to VN, RAM, HVB, and  
277 AG-S; by the generous support of the JPB Foundation, the Open Philanthropy Project (research  
278 grant 2020-215611 (5384)); and by anonymous donors to AG-S. This research was also partly

279 supported by the Office of Research Infrastructure of the National Institutes of Health (NIH)  
280 under award numbers S10OD018522 and S10OD026880. ASG-R. was further supported by a  
281 Robin Chemers Neustein Postdoctoral Fellowship Award. Human protocols and the study set-up  
282 used for this study were based on influenza virus studies established in part with the support of  
283 the FONDECYT 1161971 grant to RAM and by grant ACT 1408 to RAM and VN from the  
284 Agencia Nacional de Investigación y Desarrollo (ANID) from Chile. We gratefully acknowledge  
285 the GISAID EpiFlu™ Database, laboratories, and original source of data of Chilean SARS-CoV-  
286 2 sequences (supplementary information), especially to the Facultad de Medicina Pontifical  
287 Universidad Católica de Chile and the Center for Mathematical Modeling and the Center for  
288 Genome Regulation at Universidad de Chile, source of the EPI ISL 468748.

## 289 **Disclaimers**

290 The authors declare no competing interest.

## 291 **Author Bio**

292 Dr. Neira is assistant professor at the Animal Virology Unit, Facultad de Ciencias  
293 Veterinarias y Pecuarias, Universidad de Chile in Santiago. His research interests include  
294 understanding the diversity, transmission, and ecology of emerging and reemerging viruses in  
295 wildlife, companion, and livestock animals.

## 296 **References**

- 297 1. Shi J, Wen Z, Zhong G, Yang H, Wang C, Huang B, et al. Susceptibility of ferrets, cats,  
298 dogs, and other domesticated animals to SARS–coronavirus 2. *Science* (80- ). 2020  
299 Apr;eabb7015.

- 300 2. Liu T, Liang W, Zhong H, He J, Chen Z, He G, et al. Risk factors associated with  
301 COVID-19 infection: a retrospective cohort study based on contacts tracing. *Emerg*  
302 *Microbes Infect.* 2020 Jan;9(1):1–31.
- 303 3. Sit THC, Brackman CJ, Ip SM, Tam KWS, Law PYT, To EMW, et al. Infection of dogs  
304 with SARS-CoV-2. *Nature.* 2020 May;1–6.
- 305 4. USDA APHIS. USDA APHIS | Confirmed cases of SARS-CoV-2 in Animals in the  
306 United States. 2020.
- 307 5. McAloose D, Laverack M, Wang L, Killian ML, Caserta LC, Mitchell PK, et al. From  
308 people to Panthera: Natural SARS-CoV-2 infection in tigers and lions at the Bronx Zoo.  
309 *bioRxiv.* 2020 Jul;2020.07.22.213959.
- 310 6. Events in animals: OIE - World Organisation for Animal Health.
- 311 7. Shi J, Wen Z, Zhong G, Yang H, Wang C, Huang B, et al. Susceptibility of ferrets, cats,  
312 dogs, and other domesticated animals to SARS-coronavirus 2. *Science.* 2020  
313 May;368(6494):1016–20.
- 314 8. Sit THC, Brackman CJ, Ip SM, Tam KWS, Law PYT, To EMW, et al. Infection of dogs  
315 with SARS-CoV-2. *Nature.* 2020 May;1–3.
- 316 9. Wood L, Martin K, Christian H, Nathan A, Lauritsen C, Houghton S, et al. The Pet Factor  
317 - Companion Animals as a Conduit for Getting to Know People, Friendship Formation  
318 and Social Support. Uchino BN, editor. *PLoS One.* 2015 Apr;10(4):e0122085.
- 319 10. Oliva JL, Johnston KL. Puppy love in the time of Corona: Dog ownership protects against  
320 loneliness for those living alone during the COVID-19 lockdown. *Int J Soc Psychiatry.*

- 321 2020 Jul;002076402094419.
- 322 11. Bowen J, García E, Darder P, Argüelles J, Fatjó J. The effects of the Spanish COVID-19  
323 lockdown on people, their pets and the human-animal bond. *J Vet Behav.* 2020 Jun;
- 324 12. Halfmann PJ, Hatta M, Chiba S, Maemura T, Fan S, Takeda M, et al. Transmission of  
325 SARS-CoV-2 in Domestic Cats. *N Engl J Med.* 2020 May;
- 326 13. Neira V, Allerson M, Corzo C, Culhane M, Rendahl A, Torremorell M. Detection of  
327 influenza A virus in aerosols of vaccinated and non-vaccinated pigs in a warm  
328 environment. Huber VC, editor. *PLoS One.* 2018 May;13(5):e0197600.
- 329 14. Agüero B, Mena J, Berrios F, Tapia R, Salinas C, Dutta J, et al. First report of Porcine  
330 Respirovirus 1 in South America. *Vet Microbiol.* 2020 May;108726.
- 331 15. Tapia R, García V, Mena J, Bucarey S, Medina RA, Neira V. Infection of novel  
332 reassortant H1N2 and H3N2 swine influenza A viruses in the guinea pig model. *Vet Res.*  
333 2018 Dec;49(1):73.
- 334 16. Chu DKW, Pan Y, Cheng SMS, Hui KPY, Krishnan P, Liu Y, et al. Molecular Diagnosis  
335 of a Novel Coronavirus (2019-nCoV) Causing an Outbreak of Pneumonia. *Clin Chem.*  
336 2020;66(4):549–555.
- 337 17. OMS. Molecular assays to diagnose COVID-19: Summary table of available protocols.  
338 2020.
- 339 18. IDVET. ID Screen® SARS-CoV-2 Double Antigen Multi-species - IDVet. 2020.
- 340 19. Sevinsky J. SARS-CoV-2 Sequencing on Illumina MiSeq Using ARTIC Protocol: Part 1 -



- 341 Tiling PCR. 2020 Apr;
- 342 20. Gonzalez-Reiche AS, Hernandez MM, Sullivan MJ, Ciferri B, Alshammary H, Obla A, et  
343 al. Introductions and early spread of SARS-CoV-2 in the New York City area. *Science*  
344 (80- ). 2020 Jul;369(6501):297–301.
- 345 21. Altschul SF, Gish W, Miller W, Myers EW, Lipman DJ. Basic local alignment search  
346 tool. *J Mol Biol.* 1990 Oct;215(3):403–10.
- 347 22. R Core Team. R: A language and environment for statistical computing. Vienna, Austria:  
348 R Foundation for Statistical Computing,; 2013.
- 349 23. Miller MA, Pfeiffer W, Schwartz T. The CIPRES science gateway. In: Proceedings of the  
350 1st Conference of the Extreme Science and Engineering Discovery Environment on  
351 Bridging from the eXtreme to the campus and beyond - XSEDE '12. New York, New  
352 York, USA: ACM Press; 2012. p. 1.
- 353 24. Larsson A. AliView: a fast and lightweight alignment viewer and editor for large datasets.  
354 *Bioinforma Appl.* 2014;30(22):3276–8.
- 355 25. Rambaut A, Holmes EC, Hill V, OToole A, McCrone J, Ruis C, et al. A dynamic  
356 nomenclature proposal for SARS-CoV-2 to assist genomic epidemiology. *bioRxiv.* 2020  
357 Apr;2020.04.17.046086.
- 358 26. Deng J, Jin Y, Liu Y, Sun J, Hao L, Bai J, et al. Serological survey of SARS-CoV-2 for  
359 experimental, domestic, companion and wild animals excludes intermediate hosts of 35  
360 different species of animals. *Transbound Emerg Dis.* 2020 May;tbed.13577.
- 361 27. Zhang Q, Zhang H, Huang K, Yang Y, Hui X, Gao J, et al. SARS-CoV-2 neutralizing

- 362 serum antibodies in cats: a serological investigation. bioRxiv. 2020  
363 Apr;2020.04.01.021196.
- 364 28. Zhai X, Sun J, Yan Z, Zhang J, Zhao J, Zhao Z, et al. Comparison of SARS-CoV-2 spike  
365 protein binding to ACE2 receptors from human, pets, farm animals, and putative  
366 intermediate hosts. J Virol. 2020 May;94(15).
- 367 29. Sarkar J, Guha R. Infectivity, virulence, pathogenicity, host-pathogen interactions of  
368 SARS and SARS-CoV-2 in experimental animals: a systematic review. Veterinary  
369 Research Communications. Springer; 2020. p. 1.
- 370 30. Richard M, Kok A, de Meulder D, Bestebroer TM, Lamers MM, Okba NMA, et al.  
371 SARS-CoV-2 is transmitted via contact and via the air between ferrets. Nat Commun.  
372 2020 Dec;11(1).
- 373 31. Saegerman C, Bianchini J, Renault V, Haddad N, Humblet M. First expert elicitation of  
374 knowledge on drivers of emergence of the COVID-19 in pets. Transbound Emerg Dis.  
375 2020 Jul;tbed.13724.

376

377 Address for correspondence: Víctor Neira, Departamento de Medicina Preventiva Animal,  
378 Facultad de Ciencias Veterinarias y Pecuarias, Universidad de Chile, 11735, La Pintana,  
379 Santiago, Chile; email: [victorneira@u.uchile.cl](mailto:victorneira@u.uchile.cl)

## 380 **Figure legends**

381 Figure 1. RNA detection of SARS-CoV-2. The horizontal axis represents the sampling date.  
382 Nasal swabs (circle), fecal samples (diamond), and sputum (triangle) samples are colored per

383 individual. Negative samples are illustrated as Ct 41 (below the dotted line). Arrows with the  
384 corresponding caption colors indicate the day of symptom onset and the date of the SARS-CoV-  
385 2 diagnosis of humans.

386 Figure 2. Phylogenetic tree estimated with the all available Chilean SARS-CoV-2 sequences and  
387 a random sample of available background sequences. Near to complete genome sequences of cat  
388 2 (n=3), cat 3 (n=1), and both owners formed a monophyletic group. An additional human  
389 sequence collected in the same time period and area similarly fell into this cluster. The  
390 phylogeny was estimated using the maximum likelihood method available in IQ-TREE v1.6.7  
391 employing the GTR+F+I+ $\Gamma$ 4 model of nucleotide substitution with 1000 bootstrap replications.

392

393 **Appendix Figure.** Representation of the genome coverage and mutations with respect to  
394 Wuhan-Hu-1 reference sequence NC\_045512.2. Dark grey shaded areas indicate no coverage.  
395 Blue and red lines indicate synonymous and non-synonymous substitutions respectively. The  
396 specific nucleotide substitutions and amino acid changes are indicated at the top and bottom of  
397 the figure.

398 **Supplementary information 1.** Table 1. Summary of cases on study.

399 **Supplementary information 2.** Table 2. Individual results.

400 **Supplementary information 3.** Acknowledge to GISAID

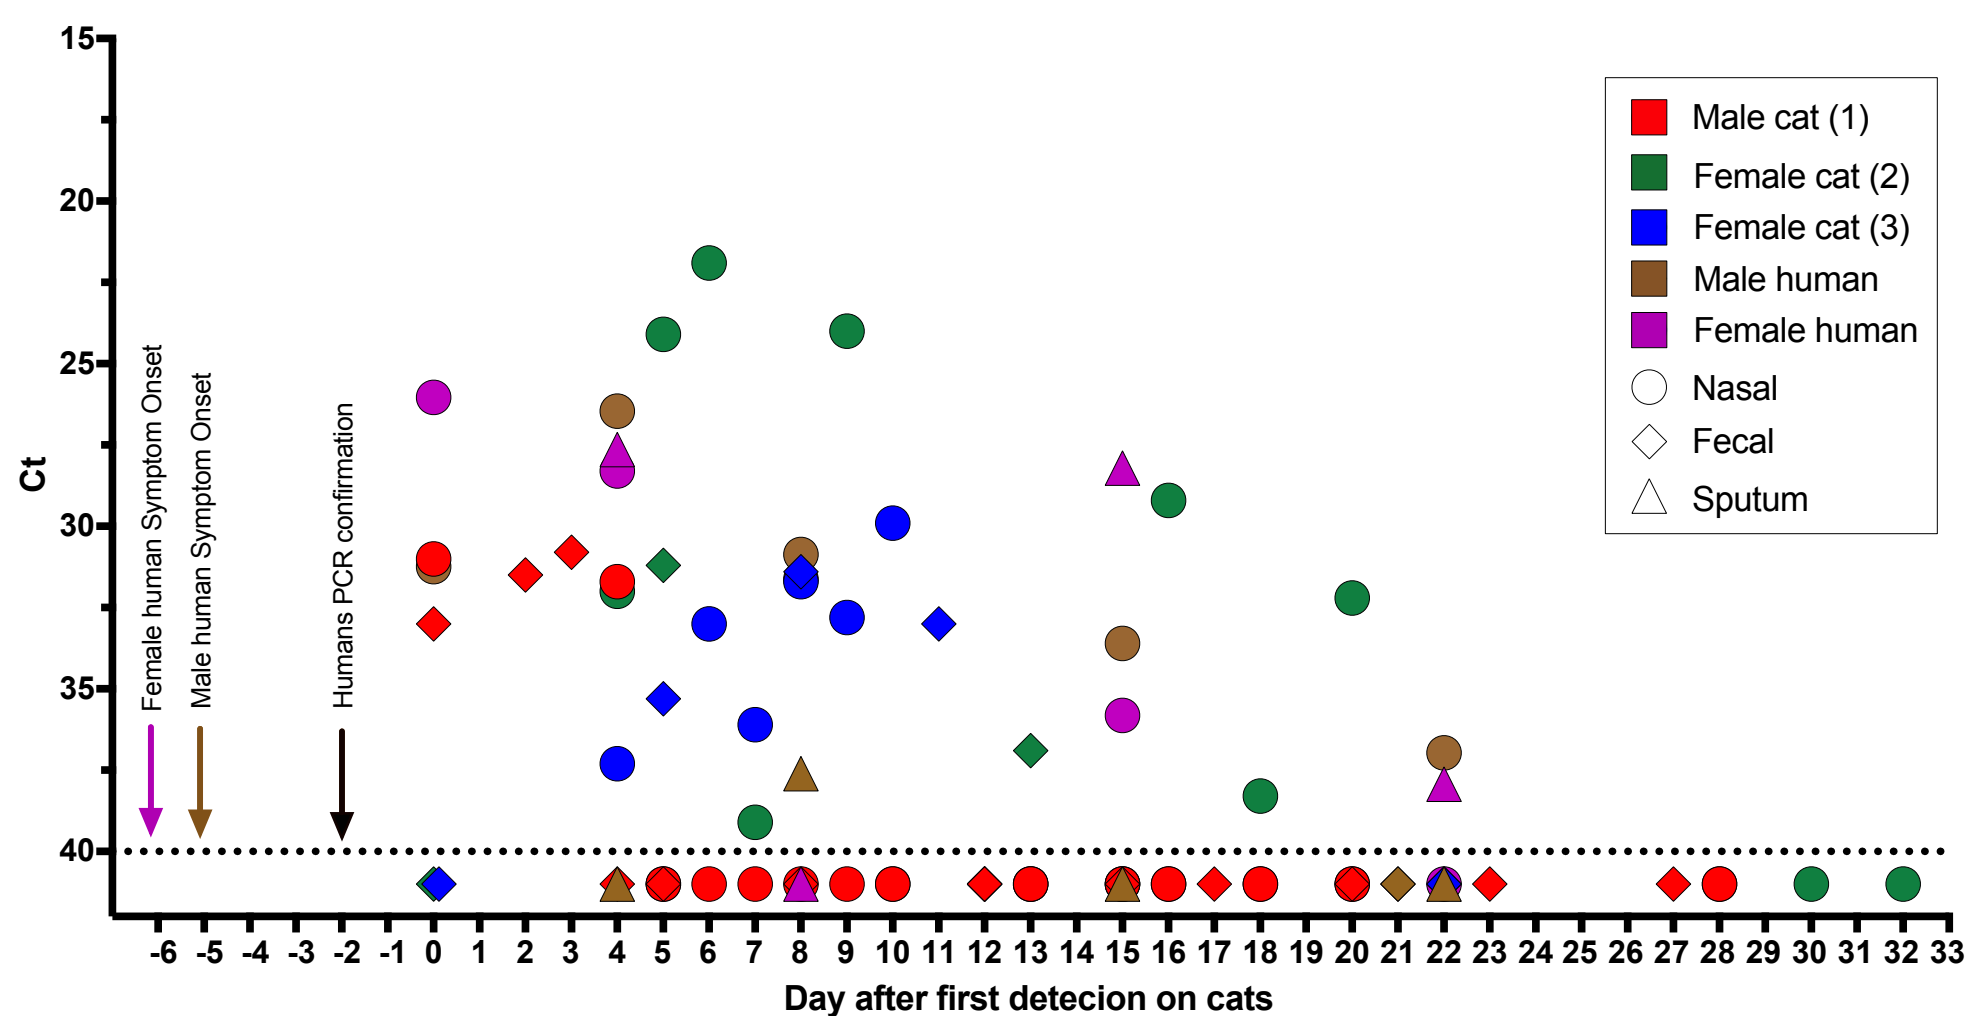

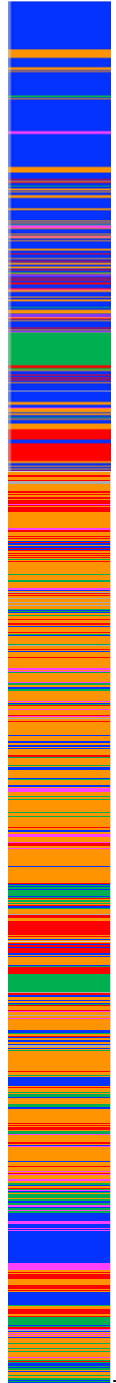

- Europe
- Asia
- Americas
- Oceania
- Africa
- Chile

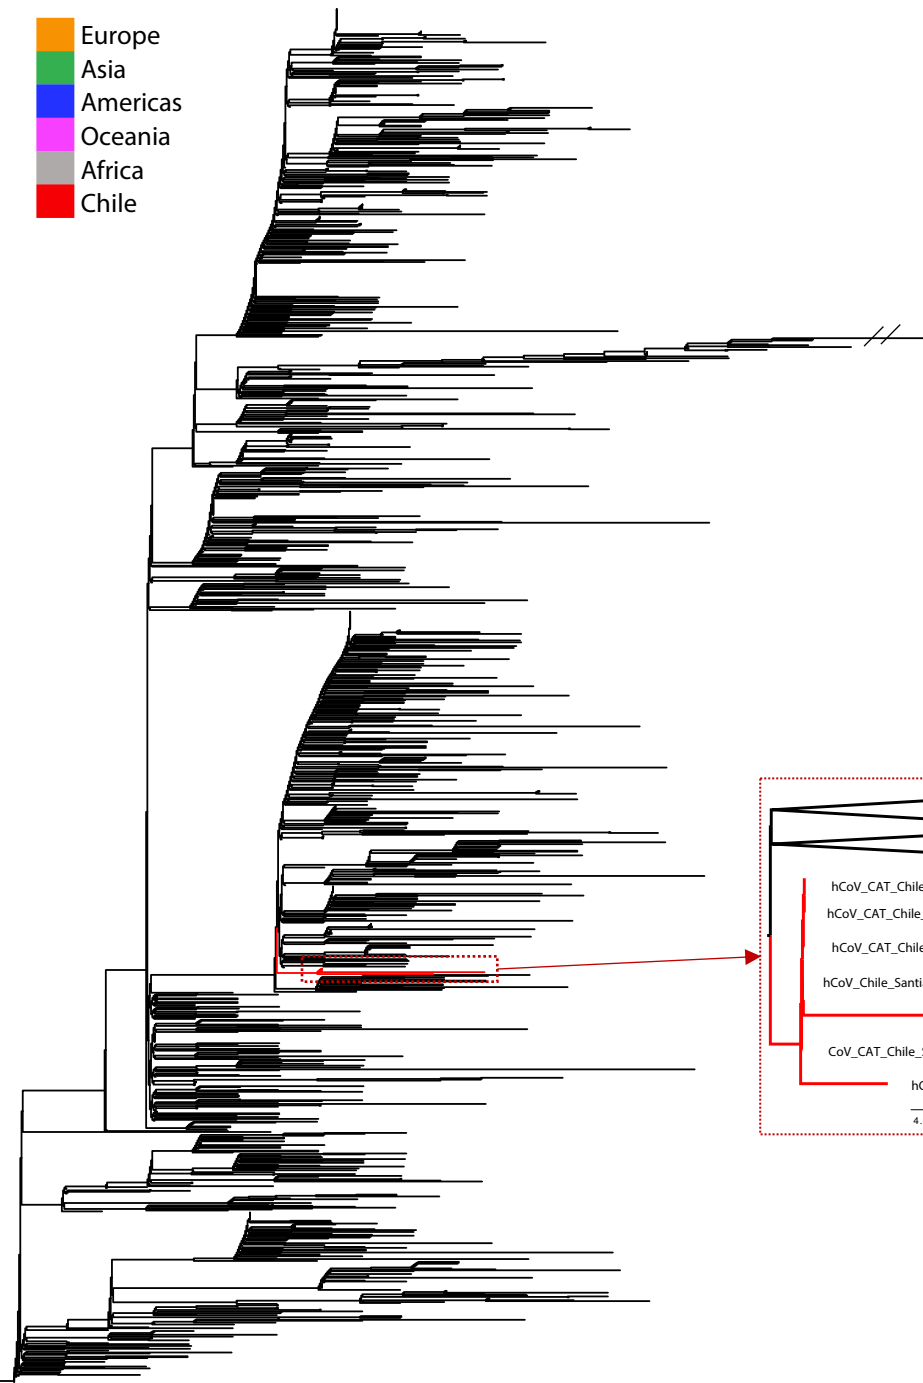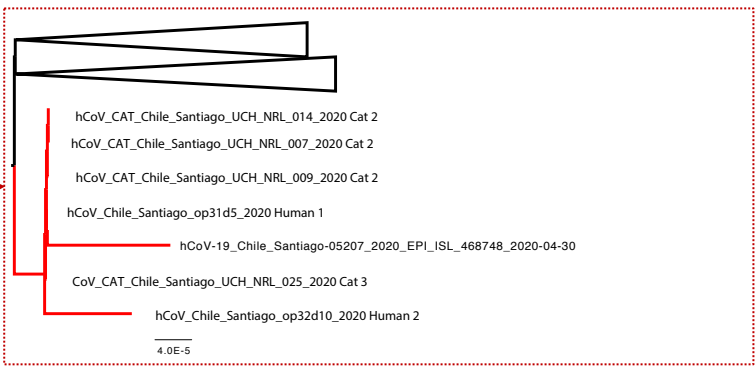

Source: https://medrxiv.org/content/10.1101/2020.10.31.20220608v1.full.pdf
