# Supplementary material for: A household case evidences shorter shedding of SARS-CoV-2 in naturally infected cats compared to their human owners
Source: bioRxiv or medRxiv preprint supplement (doi:10.1101/2020.10.31.20220608), 2020-11-04

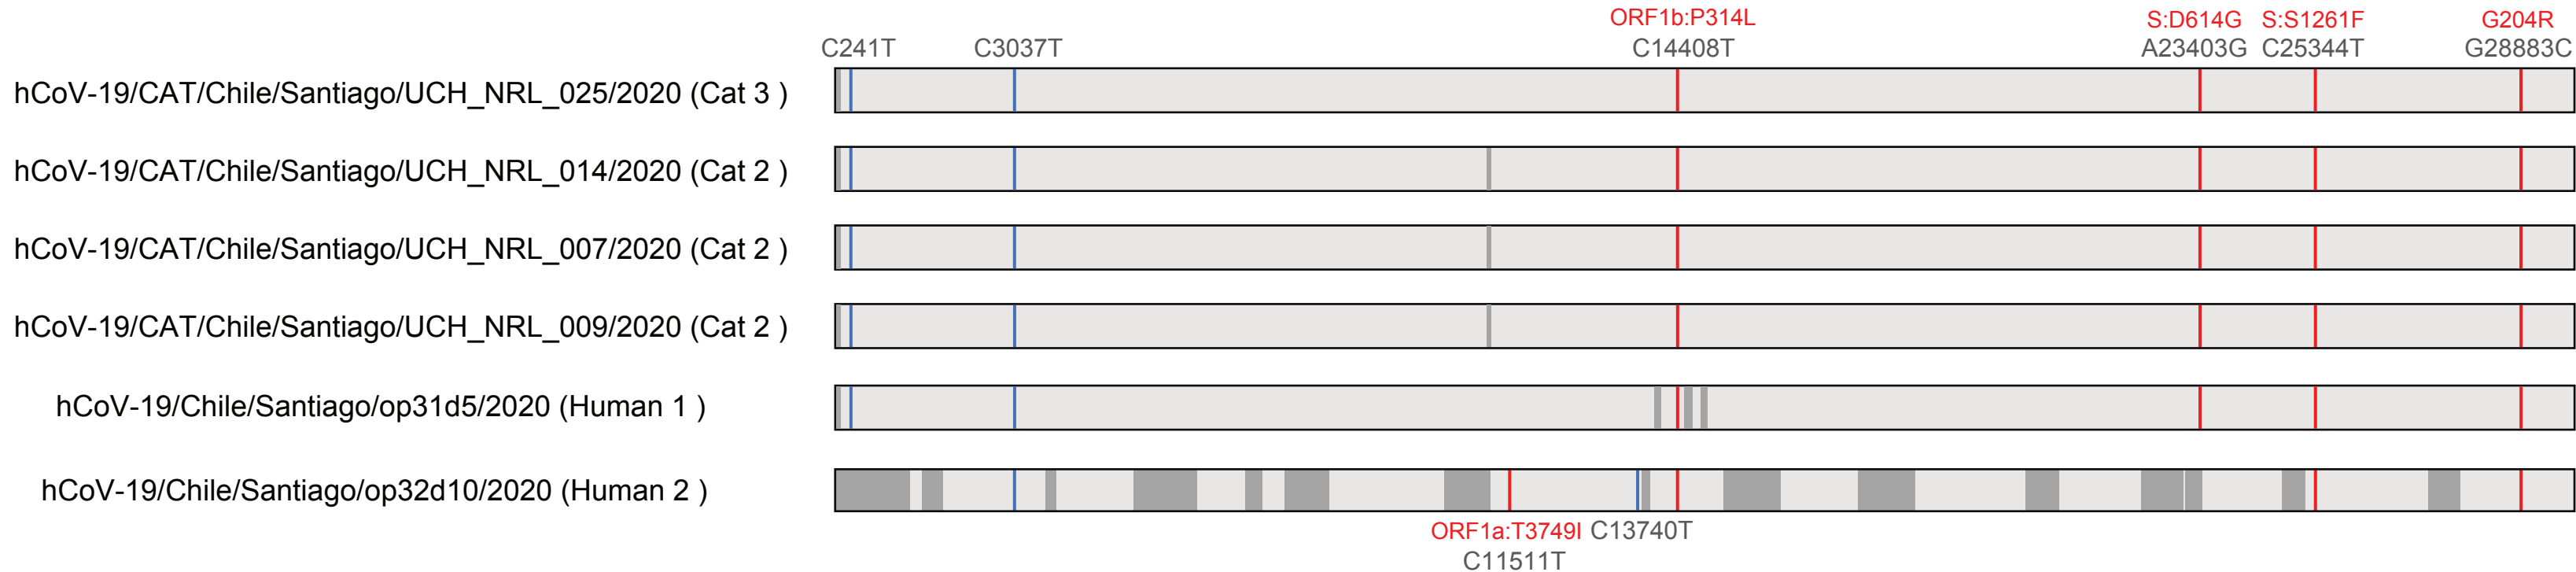

Supplement: Supplementary file [file media-1.pdf]
