# Supplementary material for: A household case evidences shorter shedding of SARS-CoV-2 in naturally infected cats compared to their human owners
Source: bioRxiv or medRxiv preprint supplement (doi:10.1101/2020.10.31.20220608), 2020-11-04
Supplement: Supplementary file [file media-3.pdf]

We gratefully acknowledge the following Authors from the Originating laboratories responsible for obtaining the specimens, as well as the Submitting laboratories where the genome data were generated and shared via GISAID, on which this research is based.

All Submitters of data may be contacted directly via [www.gisaid.org](http://www.gisaid.org)

| Accession ID                                   | Originating Laboratory                                                     | Submitting Laboratory               | Authors                                                                                                                                                                                                                                                                            |
|------------------------------------------------|----------------------------------------------------------------------------|-------------------------------------|------------------------------------------------------------------------------------------------------------------------------------------------------------------------------------------------------------------------------------------------------------------------------------|
| EPI_ISL_414577, EPI_ISL_414578                 | Hospital de Talca, Chile                                                   | Instituto de Salud Publica de Chile | Andrés E. Castillo, Bárbara Parra, Paz Tapia, Alejandra Acevedo, Jaime Lagos, Winston Andrade, Loredana Arata, Gabriel Leal, Gisselle Barra, Carolina Tambley, Javier Tognarelli, Patricia Bustos, Soledad Ulloa, Rodrigo Fasce, Jorge Fernández.                                  |
| EPI_ISL_414579                                 | Clinica Alemana de Santiago, Chile                                         | Instituto de Salud Publica de Chile | Andrés E. Castillo, Bárbara Parra, Paz Tapia, Alejandra Acevedo, Jaime Lagos, Winston Andrade, Loredana Arata, Gabriel Leal, Gisselle Barra, Carolina Tambley, Javier Tognarelli, Patricia Bustos, Soledad Ulloa, Rodrigo Fasce, Jorge Fernández.                                  |
| EPI_ISL_414580                                 | Clinica Santa Maria, Santiago, Chile                                       | Instituto de Salud Publica de Chile | Andrés E. Castillo, Bárbara Parra, Paz Tapia, Alejandra Acevedo, Jaime Lagos, Winston Andrade, Loredana Arata, Gabriel Leal, Gisselle Barra, Carolina Tambley, Javier Tognarelli, Patricia Bustos, Soledad Ulloa, Rodrigo Fasce, Jorge Fernández.                                  |
| EPI_ISL_415658, EPI_ISL_415660, EPI_ISL_415661 | Laboratory of Molecular Virology, Pontificia Universidad Católica de Chile | MSHS Pathogen Surveillance Program  | Rafael A. Medina, Pablo Vial, Tamara Garcia, Eileen Serrano, Ana Silvia Gonzalez-Reiche, Zenab Khan, Mitchell Sullivan, Ajay Obla, Matthew Hernandez, Hala Alshammari, Juan Soto, Shwetha Sridhar Hara, Ying-Chih Wang, Melissa Smith, Robert Sebra, Viviana Simon, Harm van Bakel |
| EPI_ISL_445245                                 | CLINICA ALEMANA DE SANTIAGO S.A.                                           | Instituto de Salud Publica de Chile | Andrés E Castillo, Bárbara Parra, Paz Tapia, Jaime Lagos, Loredana Arata, Alejandra Acevedo, Winston Andrade, Gabriel Leal, Carolina Tambley, Patricia Bustos, Rodrigo Fasce, Jorge Fernandez                                                                                      |
| EPI_ISL_445246                                 | HOSPITAL PUERTO MONTT                                                      | Instituto de Salud Publica de Chile | Andrés E Castillo, Bárbara Parra, Paz Tapia, Jaime Lagos, Loredana Arata, Alejandra Acevedo, Winston Andrade, Gabriel Leal, Carolina Tambley, Patricia Bustos, Rodrigo Fasce, Jorge Fernandez                                                                                      |
| EPI_ISL_445247                                 | UNIVERSIDAD DE LOS ANDES                                                   | Instituto de Salud Publica de Chile | Andrés E Castillo, Bárbara Parra, Paz Tapia, Jaime Lagos, Loredana Arata, Alejandra Acevedo, Winston Andrade, Gabriel Leal, Carolina Tambley, Patricia Bustos, Rodrigo Fasce, Jorge Fernandez                                                                                      |
| EPI_ISL_445248                                 | CLINICA ALEMANA DE SANTIAGO S.A.                                           | Instituto de Salud Publica de Chile | Andrés E Castillo, Bárbara Parra, Paz Tapia, Jaime Lagos, Loredana Arata, Alejandra Acevedo, Winston Andrade, Gabriel Leal, Carolina Tambley, Patricia Bustos, Rodrigo Fasce, Jorge Fernandez                                                                                      |
| EPI_ISL_445249                                 | CLINICA SANTA MARIA S.A.                                                   | Instituto de Salud Publica de Chile | Andrés E Castillo, Bárbara Parra, Paz Tapia, Jaime Lagos, Loredana Arata, Alejandra Acevedo, Winston Andrade, Gabriel Leal, Carolina Tambley, Patricia Bustos, Rodrigo Fasce, Jorge Fernandez                                                                                      |
| EPI_ISL_445250                                 | CLINICA ALEMANA DE SANTIAGO S.A.                                           | Instituto de Salud Publica de Chile | Andrés E Castillo, Bárbara Parra, Paz Tapia, Jaime Lagos, Loredana Arata, Alejandra Acevedo, Winston Andrade, Gabriel Leal, Carolina Tambley, Patricia Bustos, Rodrigo Fasce, Jorge Fernandez                                                                                      |
| EPI_ISL_445251                                 | HOSPITAL DE CARABINEROS                                                    | Instituto de Salud Publica de Chile | Andrés E Castillo, Bárbara Parra, Paz Tapia, Jaime Lagos, Loredana Arata, Alejandra Acevedo, Winston Andrade, Gabriel Leal, Carolina Tambley, Patricia Bustos, Rodrigo Fasce, Jorge Fernandez                                                                                      |
| EPI_ISL_445252                                 | PONTIFICIA U. CATOLICA FAC. MEDICINA                                       | Instituto de Salud Publica de Chile | Andrés E Castillo, Bárbara Parra, Paz Tapia, Jaime Lagos, Loredana Arata, Alejandra Acevedo, Winston Andrade, Gabriel Leal, Carolina Tambley, Patricia Bustos, Rodrigo Fasce, Jorge Fernandez                                                                                      |
| EPI_ISL_445253, EPI_ISL_445254, EPI_ISL_445255 | CLINICA ALEMANA DE SANTIAGO S.A.                                           | Instituto de Salud Publica de Chile | Andrés E Castillo, Bárbara Parra, Paz Tapia, Jaime Lagos, Loredana Arata, Alejandra Acevedo, Winston Andrade, Gabriel Leal, Carolina Tambley, Patricia Bustos, Rodrigo Fasce, Jorge Fernandez                                                                                      |
| EPI_ISL_445256                                 | CLINICA LAS CONDES S.A.                                                    | Instituto de Salud Publica de Chile | Andrés E Castillo, Bárbara Parra, Paz Tapia, Jaime Lagos, Loredana Arata, Alejandra Acevedo, Winston Andrade, Gabriel Leal, Carolina Tambley, Patricia Bustos, Rodrigo Fasce, Jorge Fernandez                                                                                      |
| EPI_ISL_445257                                 | CLINICA TABANCURA                                                          | Instituto de Salud Publica de Chile | Andrés E Castillo, Bárbara Parra, Paz Tapia, Jaime Lagos, Loredana Arata, Alejandra Acevedo, Winston Andrade, Gabriel Leal, Carolina Tambley, Patricia Bustos, Rodrigo Fasce, Jorge Fernandez                                                                                      |
| EPI_ISL_445258                                 | CLINICA ALEMANA DE SANTIAGO S.A.                                           | Instituto de Salud Publica de Chile | Andrés E Castillo, Bárbara Parra, Paz Tapia, Jaime Lagos, Loredana Arata, Alejandra Acevedo, Winston Andrade, Gabriel Leal, Carolina Tambley, Patricia Bustos, Rodrigo Fasce, Jorge Fernandez                                                                                      |
| EPI_ISL_445259                                 | CLINICA LAS CONDES S.A.                                                    | Instituto de Salud Publica de Chile | Andrés E Castillo, Bárbara Parra, Paz Tapia, Jaime Lagos, Loredana Arata, Alejandra Acevedo, Winston Andrade, Gabriel Leal, Carolina Tambley, Patricia Bustos, Rodrigo Fasce, Jorge Fernandez                                                                                      |
| EPI_ISL_445260                                 | CLINICA ALEMANA DE SANTIAGO S.A.                                           | Instituto de Salud Publica de Chile | Andrés E Castillo, Bárbara Parra, Paz Tapia, Jaime Lagos, Loredana Arata, Alejandra Acevedo, Winston Andrade, Gabriel Leal, Carolina Tambley, Patricia Bustos, Rodrigo Fasce, Jorge Fernandez                                                                                      |
| EPI_ISL_445261                                 | INTEGRAMEDICA LAB. CLINICO LTDA.                                           | Instituto de Salud Publica de Chile | Andrés E Castillo, Bárbara Parra, Paz Tapia, Jaime Lagos, Loredana Arata, Alejandra Acevedo, Winston Andrade, Gabriel Leal, Carolina Tambley, Patricia Bustos, Rodrigo Fasce, Jorge Fernandez                                                                                      |
| EPI_ISL_445262                                 | CLINICA TABANCURA                                                          | Instituto de Salud Publica de Chile | Andrés E Castillo, Bárbara Parra, Paz Tapia, Jaime Lagos, Loredana Arata, Alejandra Acevedo, Winston Andrade, Gabriel Leal, Carolina Tambley, Patricia Bustos, Rodrigo Fasce, Jorge Fernandez                                                                                      |
| EPI_ISL_445263                                 | MEGASALUD SPA.                                                             | Instituto de Salud Publica de Chile | Andrés E Castillo, Bárbara Parra, Paz Tapia, Jaime Lagos, Loredana Arata, Alejandra Acevedo, Winston Andrade, Gabriel Leal, Carolina Tambley, Patricia Bustos, Rodrigo Fasce, Jorge Fernandez                                                                                      |
| EPI_ISL_445264                                 | CLINICA REDSALUD VITACURA.                                                 | Instituto de Salud Publica de Chile | Andrés E Castillo, Bárbara Parra, Paz Tapia, Jaime Lagos, Loredana Arata, Alejandra Acevedo, Winston Andrade, Gabriel Leal, Carolina Tambley, Patricia Bustos, Rodrigo Fasce, Jorge Fernandez                                                                                      |
| EPI_ISL_445265                                 | PONTIFICIA UNIVERSIDAD CATOLICA DE CHILE                                   | Instituto de Salud Publica de Chile | Andrés E Castillo, Bárbara Parra, Paz Tapia, Jaime Lagos, Loredana Arata, Alejandra Acevedo, Winston Andrade, Gabriel Leal, Carolina Tambley, Patricia Bustos, Rodrigo Fasce, Jorge Fernandez                                                                                      |
| EPI_ISL_445266, EPI_ISL_445267                 | CENTRO ONCOLOGICO DEL NORTE                                                | Instituto de Salud Publica de Chile | Andrés E Castillo, Bárbara Parra, Paz Tapia, Jaime Lagos, Loredana Arata, Alejandra Acevedo, Winston Andrade, Gabriel Leal, Carolina Tambley, Patricia Bustos, Rodrigo Fasce, Jorge Fernandez                                                                                      |
| EPI_ISL_445268, EPI_ISL_445269                 | HOSPITAL REG.LAUTARO NAVARRO AVARIA                                        | Instituto de Salud Publica de Chile | Andrés E Castillo, Bárbara Parra, Paz Tapia, Jaime Lagos, Loredana Arata, Alejandra Acevedo, Winston Andrade, Gabriel Leal, Carolina Tambley, Patricia Bustos, Rodrigo Fasce, Jorge Fernandez                                                                                      |
| EPI_ISL_445270                                 | HOSPITAL DR.HERNAN HENRIQUEZ ARAVENA                                       | Instituto de Salud Publica de Chile | Andrés E Castillo, Bárbara Parra, Paz Tapia, Jaime Lagos, Loredana Arata, Alejandra Acevedo, Winston Andrade, Gabriel Leal, Carolina Tambley, Patricia Bustos, Rodrigo Fasce, Jorge Fernandez                                                                                      |
| EPI_ISL_445271                                 | LABORATORIO CLINICA CHILLAN                                                | Instituto de Salud Publica de Chile | Andrés E Castillo, Bárbara Parra, Paz Tapia, Jaime Lagos, Loredana Arata, Alejandra Acevedo, Winston Andrade, Gabriel Leal, Carolina Tambley, Patricia Bustos, Rodrigo Fasce, Jorge Fernandez                                                                                      |
| EPI_ISL_445272                                 | CLINICA CIUDAD DEL MAR                                                     | Instituto de Salud Publica de Chile | Andrés E Castillo, Bárbara Parra, Paz Tapia, Jaime Lagos, Loredana Arata, Alejandra Acevedo, Winston Andrade, Gabriel Leal, Carolina Tambley, Patricia Bustos, Rodrigo Fasce, Jorge Fernandez                                                                                      |
| EPI_ISL_445273, EPI_ISL_445274                 | LABORATORIO TORRE MEDICA LTDA.                                             | Instituto de Salud Publica de Chile | Andrés E Castillo, Bárbara Parra, Paz Tapia, Jaime Lagos, Loredana Arata, Alejandra Acevedo, Winston Andrade, Gabriel Leal, Carolina Tambley, Patricia Bustos, Rodrigo Fasce, Jorge Fernandez                                                                                      |
| EPI_ISL_445275, EPI_ISL_445276                 | HOSPITAL CLINICO FUSAT                                                     | Instituto de Salud Publica de Chile | Andrés E Castillo, Bárbara Parra, Paz Tapia, Jaime Lagos, Loredana Arata, Alejandra Acevedo, Winston Andrade, Gabriel Leal, Carolina Tambley, Patricia Bustos, Rodrigo Fasce, Jorge Fernandez                                                                                      |
| EPI_ISL_445277                                 | FUNDACION DE SALUD EL TENIENTE                                             | Instituto de Salud Publica de Chile | Andrés E Castillo, Bárbara Parra, Paz Tapia, Jaime Lagos, Loredana Arata, Alejandra Acevedo, Winston Andrade, Gabriel Leal, Carolina Tambley, Patricia Bustos, Rodrigo Fasce, Jorge Fernandez                                                                                      |
| EPI_ISL_445278                                 | LABORATORIO TORRE MEDICA LTDA.                                             | Instituto de Salud Publica de Chile | Andrés E Castillo, Bárbara Parra, Paz Tapia, Jaime Lagos, Loredana Arata, Alejandra Acevedo, Winston Andrade, Gabriel Leal, Carolina Tambley, Patricia Bustos, Rodrigo Fasce, Jorge Fernandez                                                                                      |
| EPI_ISL_445279                                 | LABORATORIO INMUNOLAB SPA                                                  | Instituto de Salud Publica de Chile | Andrés E Castillo, Bárbara Parra, Paz Tapia, Jaime Lagos, Loredana Arata, Alejandra Acevedo, Winston Andrade, Gabriel Leal, Carolina Tambley, Patricia Bustos, Rodrigo Fasce, Jorge Fernandez                                                                                      |
| EPI_ISL_445280                                 | HOSPITAL REG.LAUTARO NAVARRO AVARIA                                        | Instituto de Salud Publica de Chile | Andrés E Castillo, Bárbara Parra, Paz Tapia, Jaime Lagos, Loredana Arata, Alejandra Acevedo, Winston Andrade, Gabriel Leal, Carolina Tambley, Patricia Bustos, Rodrigo Fasce, Jorge Fernandez                                                                                      |
| EPI_ISL_445281                                 | HOSPITAL CLINICO DEL SUR                                                   | Instituto de Salud Publica de Chile | Andrés E Castillo, Bárbara Parra, Paz Tapia, Jaime Lagos, Loredana Arata, Alejandra Acevedo, Winston Andrade, Gabriel Leal, Carolina Tambley, Patricia Bustos, Rodrigo Fasce, Jorge Fernandez                                                                                      |
| EPI_ISL_445282, EPI_ISL_445283                 | CLINICA MAGALLANES S.A.                                                    | Instituto de Salud Publica de Chile | Andrés E Castillo, Bárbara Parra, Paz Tapia, Jaime Lagos, Loredana Arata, Alejandra Acevedo, Winston Andrade, Gabriel Leal, Carolina Tambley, Patricia Bustos, Rodrigo Fasce, Jorge Fernandez                                                                                      |
| EPI_ISL_445284                                 | HOSPITAL REG.LAUTARO NAVARRO AVARIA                                        | Instituto de Salud Publica de Chile | Andrés E Castillo, Bárbara Parra, Paz Tapia, Jaime Lagos, Loredana Arata, Alejandra Acevedo, Winston Andrade, Gabriel Leal, Carolina Tambley, Patricia Bustos, Rodrigo Fasce, Jorge Fernandez                                                                                      |
| EPI_ISL_445285                                 | CLINICA CIUDAD DEL MAR                                                     | Instituto de Salud Publica de Chile | Andrés E Castillo, Bárbara Parra, Paz Tapia, Jaime Lagos, Loredana Arata, Alejandra Acevedo, Winston Andrade, Gabriel Leal, Carolina Tambley, Patricia Bustos, Rodrigo Fasce, Jorge Fernandez                                                                                      |
| EPI_ISL_445286                                 | HOSPITAL HANGA ROA                                                         | Instituto de Salud Publica de Chile | Andrés E Castillo, Bárbara Parra, Paz Tapia, Jaime Lagos, Loredana Arata, Alejandra Acevedo, Winston Andrade, Gabriel Leal, Carolina Tambley, Patricia Bustos, Rodrigo Fasce, Jorge Fernandez                                                                                      |
| EPI_ISL_445287                                 | CLINICA CIUDAD DEL MAR                                                     | Instituto de Salud Publica de Chile | Andrés E Castillo, Bárbara Parra, Paz Tapia, Jaime Lagos, Loredana Arata, Alejandra Acevedo, Winston Andrade, Gabriel Leal, Carolina Tambley, Patricia Bustos, Rodrigo Fasce, Jorge Fernandez                                                                                      |

|                                                |                                                 |                                     |                                                                                                           |
|------------------------------------------------|-------------------------------------------------|-------------------------------------|-----------------------------------------------------------------------------------------------------------|
| EPI_ISL_445288                                 | HOSPITAL REG.LAUTARO NAVARRO AVARIA             | Instituto de Salud Publica de Chile | Andrés E Castillo, Bárbara Parra,Paz Tapia, Jaime Lagos, Loredana Arata, Alejandra Fernandez              |
| EPI_ISL_445289                                 | HOSPITAL NAVAL PUERTO WILLIAMS                  | Instituto de Salud Publica de Chile | Acevedo, Winston Andrade, Gabriel Leal, Carolina Tambley, Patricia Bustos, Rodrigo Fasce, Jorge Fernandez |
| EPI_ISL_445290, EPI_ISL_445291, EPI_ISL_445292 | CLINICA MAGALLANES S.A.                         | Instituto de Salud Publica de Chile | Acevedo, Winston Andrade, Gabriel Leal, Carolina Tambley, Patricia Bustos, Rodrigo Fasce, Jorge Fernandez |
| EPI_ISL_445293, EPI_ISL_445294, EPI_ISL_445295 | HOSPITAL REG.LAUTARO NAVARRO AVARIA             | Instituto de Salud Publica de Chile | Acevedo, Winston Andrade, Gabriel Leal, Carolina Tambley, Patricia Bustos, Rodrigo Fasce, Jorge Fernandez |
| EPI_ISL_445296                                 | HOSPITAL REGIONAL DE COYHAIQUE                  | Instituto de Salud Publica de Chile | Acevedo, Winston Andrade, Gabriel Leal, Carolina Tambley, Patricia Bustos, Rodrigo Fasce, Jorge Fernandez |
| EPI_ISL_445297                                 | CLINICA INTEGRAL S.A.                           | Instituto de Salud Publica de Chile | Acevedo, Winston Andrade, Gabriel Leal, Carolina Tambley, Patricia Bustos, Rodrigo Fasce, Jorge Fernandez |
| EPI_ISL_445298                                 | HOSPITAL DE SAN FERNANDO                        | Instituto de Salud Publica de Chile | Acevedo, Winston Andrade, Gabriel Leal, Carolina Tambley, Patricia Bustos, Rodrigo Fasce, Jorge Fernandez |
| EPI_ISL_445299                                 | CLINICA MAGALLANES S.A.                         | Instituto de Salud Publica de Chile | Acevedo, Winston Andrade, Gabriel Leal, Carolina Tambley, Patricia Bustos, Rodrigo Fasce, Jorge Fernandez |
| EPI_ISL_445300                                 | HOSPITAL DE RANCAGUA                            | Instituto de Salud Publica de Chile | Acevedo, Winston Andrade, Gabriel Leal, Carolina Tambley, Patricia Bustos, Rodrigo Fasce, Jorge Fernandez |
| EPI_ISL_445301                                 | HOSPITAL NAVAL PUERTO WILLIAMS                  | Instituto de Salud Publica de Chile | Acevedo, Winston Andrade, Gabriel Leal, Carolina Tambley, Patricia Bustos, Rodrigo Fasce, Jorge Fernandez |
| EPI_ISL_445302                                 | INSTITUTO MEDICO LEGAL                          | Instituto de Salud Publica de Chile | Acevedo, Winston Andrade, Gabriel Leal, Carolina Tambley, Patricia Bustos, Rodrigo Fasce, Jorge Fernandez |
| EPI_ISL_445303                                 | CTRO.DE SALUD FAMILIAR DR. RAUL YAZIGI          | Instituto de Salud Publica de Chile | Acevedo, Winston Andrade, Gabriel Leal, Carolina Tambley, Patricia Bustos, Rodrigo Fasce, Jorge Fernandez |
| EPI_ISL_445304                                 | HOSPITAL SAN JUAN DE DIOS                       | Instituto de Salud Publica de Chile | Acevedo, Winston Andrade, Gabriel Leal, Carolina Tambley, Patricia Bustos, Rodrigo Fasce, Jorge Fernandez |
| EPI_ISL_445305                                 | HOSPITAL DE CARABINEROS                         | Instituto de Salud Publica de Chile | Acevedo, Winston Andrade, Gabriel Leal, Carolina Tambley, Patricia Bustos, Rodrigo Fasce, Jorge Fernandez |
| EPI_ISL_445306                                 | CLINICA UC SAN CARLOS DE APOQUINDO              | Instituto de Salud Publica de Chile | Acevedo, Winston Andrade, Gabriel Leal, Carolina Tambley, Patricia Bustos, Rodrigo Fasce, Jorge Fernandez |
| EPI_ISL_445307                                 | HOSPITAL SAN JOSE DE MAIPO                      | Instituto de Salud Publica de Chile | Acevedo, Winston Andrade, Gabriel Leal, Carolina Tambley, Patricia Bustos, Rodrigo Fasce, Jorge Fernandez |
| EPI_ISL_445308                                 | HOSPITAL EL CARMEN DR.LUIS VALENTIN F.          | Instituto de Salud Publica de Chile | Acevedo, Winston Andrade, Gabriel Leal, Carolina Tambley, Patricia Bustos, Rodrigo Fasce, Jorge Fernandez |
| EPI_ISL_445309                                 | MUTUAL DE SEGURIDAD C.CH.C.                     | Instituto de Salud Publica de Chile | Acevedo, Winston Andrade, Gabriel Leal, Carolina Tambley, Patricia Bustos, Rodrigo Fasce, Jorge Fernandez |
| EPI_ISL_445310                                 | HOSPITAL DR.SOTERO DEL RIO                      | Instituto de Salud Publica de Chile | Acevedo, Winston Andrade, Gabriel Leal, Carolina Tambley, Patricia Bustos, Rodrigo Fasce, Jorge Fernandez |
| EPI_ISL_445311                                 | MEGASALUD S.A.                                  | Instituto de Salud Publica de Chile | Acevedo, Winston Andrade, Gabriel Leal, Carolina Tambley, Patricia Bustos, Rodrigo Fasce, Jorge Fernandez |
| EPI_ISL_445312                                 | CLINICA UC SAN CARLOS DE APOQUINDO              | Instituto de Salud Publica de Chile | Acevedo, Winston Andrade, Gabriel Leal, Carolina Tambley, Patricia Bustos, Rodrigo Fasce, Jorge Fernandez |
| EPI_ISL_445313, EPI_ISL_445314                 | HOSPITAL EL CARMEN DR.LUIS VALENTIN F.          | Instituto de Salud Publica de Chile | Acevedo, Winston Andrade, Gabriel Leal, Carolina Tambley, Patricia Bustos, Rodrigo Fasce, Jorge Fernandez |
| EPI_ISL_445315                                 | CLINICA UC SAN CARLOS DE APOQUINDO              | Instituto de Salud Publica de Chile | Acevedo, Winston Andrade, Gabriel Leal, Carolina Tambley, Patricia Bustos, Rodrigo Fasce, Jorge Fernandez |
| EPI_ISL_445316                                 | CESFAM BALMACEDA DE RENCA                       | Instituto de Salud Publica de Chile | Acevedo, Winston Andrade, Gabriel Leal, Carolina Tambley, Patricia Bustos, Rodrigo Fasce, Jorge Fernandez |
| EPI_ISL_445317                                 | UNIV.DE CHILE HOSP.CLINICO                      | Instituto de Salud Publica de Chile | Acevedo, Winston Andrade, Gabriel Leal, Carolina Tambley, Patricia Bustos, Rodrigo Fasce, Jorge Fernandez |
| EPI_ISL_445318                                 | C.DE SALUD FAMILIAR PABLO NERUDA                | Instituto de Salud Publica de Chile | Acevedo, Winston Andrade, Gabriel Leal, Carolina Tambley, Patricia Bustos, Rodrigo Fasce, Jorge Fernandez |
| EPI_ISL_445319                                 | HOSPITAL FELIX BULNES                           | Instituto de Salud Publica de Chile | Acevedo, Winston Andrade, Gabriel Leal, Carolina Tambley, Patricia Bustos, Rodrigo Fasce, Jorge Fernandez |
| EPI_ISL_445320                                 | C.C.SALUD FAMILIAR PADRE FELIX DONOSO G.        | Instituto de Salud Publica de Chile | Acevedo, Winston Andrade, Gabriel Leal, Carolina Tambley, Patricia Bustos, Rodrigo Fasce, Jorge Fernandez |
| EPI_ISL_445321                                 | HOSPITAL FELIX BULNES                           | Instituto de Salud Publica de Chile | Acevedo, Winston Andrade, Gabriel Leal, Carolina Tambley, Patricia Bustos, Rodrigo Fasce, Jorge Fernandez |
| EPI_ISL_445322                                 | UNIV.DE CHILE HOSP.CLINICO                      | Instituto de Salud Publica de Chile | Acevedo, Winston Andrade, Gabriel Leal, Carolina Tambley, Patricia Bustos, Rodrigo Fasce, Jorge Fernandez |
| EPI_ISL_445323                                 | HOSP.ENFERMEDADES INFECCIOSAS                   | Instituto de Salud Publica de Chile | Acevedo, Winston Andrade, Gabriel Leal, Carolina Tambley, Patricia Bustos, Rodrigo Fasce, Jorge Fernandez |
| EPI_ISL_445324                                 | INTEGRAMEDICA S.A                               | Instituto de Salud Publica de Chile | Acevedo, Winston Andrade, Gabriel Leal, Carolina Tambley, Patricia Bustos, Rodrigo Fasce, Jorge Fernandez |
| EPI_ISL_445325                                 | HOSPITAL DR.SOTERO DEL RIO                      | Instituto de Salud Publica de Chile | Acevedo, Winston Andrade, Gabriel Leal, Carolina Tambley, Patricia Bustos, Rodrigo Fasce, Jorge Fernandez |
| EPI_ISL_445326                                 | ASISTENCIA PUBLICA DR.ALEJANDRO DEL RIO         | Instituto de Salud Publica de Chile | Acevedo, Winston Andrade, Gabriel Leal, Carolina Tambley, Patricia Bustos, Rodrigo Fasce, Jorge Fernandez |
| EPI_ISL_445327                                 | HOSPITAL PADRE HURTADO                          | Instituto de Salud Publica de Chile | Acevedo, Winston Andrade, Gabriel Leal, Carolina Tambley, Patricia Bustos, Rodrigo Fasce, Jorge Fernandez |
| EPI_ISL_445328                                 | MEGASALUD S.A.                                  | Instituto de Salud Publica de Chile | Acevedo, Winston Andrade, Gabriel Leal, Carolina Tambley, Patricia Bustos, Rodrigo Fasce, Jorge Fernandez |
| EPI_ISL_445329                                 | HOSPITAL DR.SOTERO DEL RIO                      | Instituto de Salud Publica de Chile | Acevedo, Winston Andrade, Gabriel Leal, Carolina Tambley, Patricia Bustos, Rodrigo Fasce, Jorge Fernandez |
| EPI_ISL_445330                                 | CLINICA VESPUCIO S. A.                          | Instituto de Salud Publica de Chile | Acevedo, Winston Andrade, Gabriel Leal, Carolina Tambley, Patricia Bustos, Rodrigo Fasce, Jorge Fernandez |
| EPI_ISL_445331, EPI_ISL_445332                 | HOSPITAL HERMINDA MARTIN CHILLAN                | Instituto de Salud Publica de Chile | Acevedo, Winston Andrade, Gabriel Leal, Carolina Tambley, Patricia Bustos, Rodrigo Fasce, Jorge Fernandez |
| EPI_ISL_445333                                 | LABORATORIO CLINICA UNIVERSITARIA DE CONCEPCION | Instituto de Salud Publica de Chile | Acevedo, Winston Andrade, Gabriel Leal, Carolina Tambley, Patricia Bustos, Rodrigo Fasce, Jorge Fernandez |
| EPI_ISL_445334                                 | CLINICA UNIVERSITARIA DE PUERTO MONTT S.A.      | Instituto de Salud Publica de Chile | Acevedo, Winston Andrade, Gabriel Leal, Carolina Tambley, Patricia Bustos, Rodrigo Fasce, Jorge Fernandez |
| EPI_ISL_445335                                 | HOSPITAL DE CALBUCO                             | Instituto de Salud Publica de Chile | Acevedo, Winston Andrade, Gabriel Leal, Carolina Tambley, Patricia Bustos, Rodrigo Fasce, Jorge Fernandez |
| EPI_ISL_445336                                 | HOSPITAL LAS HIGUERAS DE TALCAHUANO             | Instituto de Salud Publica de Chile | Acevedo, Winston Andrade, Gabriel Leal, Carolina Tambley, Patricia Bustos, Rodrigo Fasce, Jorge Fernandez |
| EPI_ISL_445337                                 | HOSPITAL HANGA ROA                              | Instituto de Salud Publica de Chile | Acevedo, Winston Andrade, Gabriel Leal, Carolina Tambley, Patricia Bustos, Rodrigo Fasce, Jorge Fernandez |

|                                                                                                                                                |                                                                                 |                                                                                    |                                                                                                                                                                                              |
|------------------------------------------------------------------------------------------------------------------------------------------------|---------------------------------------------------------------------------------|------------------------------------------------------------------------------------|----------------------------------------------------------------------------------------------------------------------------------------------------------------------------------------------|
| see above                                                                                                                                      | HOSPITAL DR.HERNAN HENRIQUEZ ARAVENA                                            | Instituto de Salud Publica de Chile                                                | Andrés E Castillo, Bárbara Parra,Paz Tapia, Jaime Lagos, Loredana Arata, Alejandra Acevedo, Winston Andrade, Gabriel Leal, Carolina Tambley, Patricia Bustos, Rodrigo Fasce, Jorge Fernandez |
| EPI_ISL_445349, EPI_ISL_445350, EPI_ISL_445351                                                                                                 | HOSPITAL SAN JUAN DE DIOS                                                       | Instituto de Salud Publica de Chile                                                | Andrés E Castillo, Bárbara Parra,Paz Tapia, Jaime Lagos, Loredana Arata, Alejandra Acevedo, Winston Andrade, Gabriel Leal, Carolina Tambley, Patricia Bustos, Rodrigo Fasce, Jorge Fernandez |
| EPI_ISL_445352                                                                                                                                 | HOSPITAL DEL PROFESOR                                                           | Instituto de Salud Publica de Chile                                                | Andrés E Castillo, Bárbara Parra,Paz Tapia, Jaime Lagos, Loredana Arata, Alejandra Acevedo, Winston Andrade, Gabriel Leal, Carolina Tambley, Patricia Bustos, Rodrigo Fasce, Jorge Fernandez |
| EPI_ISL_445353                                                                                                                                 | HOSPITAL PADRE HURTADO                                                          | Instituto de Salud Publica de Chile                                                | Andrés E Castillo, Bárbara Parra,Paz Tapia, Jaime Lagos, Loredana Arata, Alejandra Acevedo, Winston Andrade, Gabriel Leal, Carolina Tambley, Patricia Bustos, Rodrigo Fasce, Jorge Fernandez |
| EPI_ISL_445354                                                                                                                                 | HOSPITAL DE CARABINEROS                                                         | Instituto de Salud Publica de Chile                                                | Andrés E Castillo, Bárbara Parra,Paz Tapia, Jaime Lagos, Loredana Arata, Alejandra Acevedo, Winston Andrade, Gabriel Leal, Carolina Tambley, Patricia Bustos, Rodrigo Fasce, Jorge Fernandez |
| EPI_ISL_445355                                                                                                                                 | MUTUAL DE SEGURIDAD C.CH.C.                                                     | Instituto de Salud Publica de Chile                                                | Andrés E Castillo, Bárbara Parra,Paz Tapia, Jaime Lagos, Loredana Arata, Alejandra Acevedo, Winston Andrade, Gabriel Leal, Carolina Tambley, Patricia Bustos, Rodrigo Fasce, Jorge Fernandez |
| EPI_ISL_445356                                                                                                                                 | PONTIFICIA U. CATOLICA SERV. LABORATORIO                                        | Instituto de Salud Publica de Chile                                                | Andrés E Castillo, Bárbara Parra,Paz Tapia, Jaime Lagos, Loredana Arata, Alejandra Acevedo, Winston Andrade, Gabriel Leal, Carolina Tambley, Patricia Bustos, Rodrigo Fasce, Jorge Fernandez |
| EPI_ISL_445357                                                                                                                                 | INTEGRAMEDICA CENTROS MEDICOS S.A.                                              | Instituto de Salud Publica de Chile                                                | Andrés E Castillo, Bárbara Parra,Paz Tapia, Jaime Lagos, Loredana Arata, Alejandra Acevedo, Winston Andrade, Gabriel Leal, Carolina Tambley, Patricia Bustos, Rodrigo Fasce, Jorge Fernandez |
| EPI_ISL_445358                                                                                                                                 | MEGASALUD SPA.                                                                  | Instituto de Salud Publica de Chile                                                | Andrés E Castillo, Bárbara Parra,Paz Tapia, Jaime Lagos, Loredana Arata, Alejandra Acevedo, Winston Andrade, Gabriel Leal, Carolina Tambley, Patricia Bustos, Rodrigo Fasce, Jorge Fernandez |
| EPI_ISL_445359                                                                                                                                 | HOSP. SANTIAGO ORIENTE DR. LUIS TISNE B.                                        | Instituto de Salud Publica de Chile                                                | Andrés E Castillo, Bárbara Parra,Paz Tapia, Jaime Lagos, Loredana Arata, Alejandra Acevedo, Winston Andrade, Gabriel Leal, Carolina Tambley, Patricia Bustos, Rodrigo Fasce, Jorge Fernandez |
| EPI_ISL_445360                                                                                                                                 | HOSPITAL DEL PROFESOR                                                           | Instituto de Salud Publica de Chile                                                | Andrés E Castillo, Bárbara Parra,Paz Tapia, Jaime Lagos, Loredana Arata, Alejandra Acevedo, Winston Andrade, Gabriel Leal, Carolina Tambley, Patricia Bustos, Rodrigo Fasce, Jorge Fernandez |
| EPI_ISL_445361                                                                                                                                 | CLINICA UC SAN CARLOS DE APOQUINDO                                              | Instituto de Salud Publica de Chile                                                | Andrés E Castillo, Bárbara Parra,Paz Tapia, Jaime Lagos, Loredana Arata, Alejandra Acevedo, Winston Andrade, Gabriel Leal, Carolina Tambley, Patricia Bustos, Rodrigo Fasce, Jorge Fernandez |
| EPI_ISL_445362                                                                                                                                 | BUPA SERVICIOS CLINICOS S.A                                                     | Instituto de Salud Publica de Chile                                                | Andrés E Castillo, Bárbara Parra,Paz Tapia, Jaime Lagos, Loredana Arata, Alejandra Acevedo, Winston Andrade, Gabriel Leal, Carolina Tambley, Patricia Bustos, Rodrigo Fasce, Jorge Fernandez |
| EPI_ISL_445363                                                                                                                                 | ASISTENCIA PUBLICA DR.ALEJANDRO DEL RIO                                         | Instituto de Salud Publica de Chile                                                | Andrés E Castillo, Bárbara Parra,Paz Tapia, Jaime Lagos, Loredana Arata, Alejandra Acevedo, Winston Andrade, Gabriel Leal, Carolina Tambley, Patricia Bustos, Rodrigo Fasce, Jorge Fernandez |
| EPI_ISL_445364                                                                                                                                 | HOSPITAL EL CARMEN DR.LUIS VALENTIN F.                                          | Instituto de Salud Publica de Chile                                                | Andrés E Castillo, Bárbara Parra,Paz Tapia, Jaime Lagos, Loredana Arata, Alejandra Acevedo, Winston Andrade, Gabriel Leal, Carolina Tambley, Patricia Bustos, Rodrigo Fasce, Jorge Fernandez |
| EPI_ISL_445365, EPI_ISL_445366                                                                                                                 | HOSPITAL DR.SOTERO DEL RIO                                                      | Instituto de Salud Publica de Chile                                                | Andrés E Castillo, Bárbara Parra,Paz Tapia, Jaime Lagos, Loredana Arata, Alejandra Acevedo, Winston Andrade, Gabriel Leal, Carolina Tambley, Patricia Bustos, Rodrigo Fasce, Jorge Fernandez |
| EPI_ISL_445367                                                                                                                                 | ASISTENCIA PUBLICA DR.ALEJANDRO DEL RIO                                         | Instituto de Salud Publica de Chile                                                | Andrés E Castillo, Bárbara Parra,Paz Tapia, Jaime Lagos, Loredana Arata, Alejandra Acevedo, Winston Andrade, Gabriel Leal, Carolina Tambley, Patricia Bustos, Rodrigo Fasce, Jorge Fernandez |
| EPI_ISL_445368                                                                                                                                 | HOSPITAL DEL PROFESOR                                                           | Instituto de Salud Publica de Chile                                                | Andrés E Castillo, Bárbara Parra,Paz Tapia, Jaime Lagos, Loredana Arata, Alejandra Acevedo, Winston Andrade, Gabriel Leal, Carolina Tambley, Patricia Bustos, Rodrigo Fasce, Jorge Fernandez |
| EPI_ISL_445369, EPI_ISL_445370                                                                                                                 | HOSPITAL DE CARABINEROS                                                         | Instituto de Salud Publica de Chile                                                | Andrés E Castillo, Bárbara Parra,Paz Tapia, Jaime Lagos, Loredana Arata, Alejandra Acevedo, Winston Andrade, Gabriel Leal, Carolina Tambley, Patricia Bustos, Rodrigo Fasce, Jorge Fernandez |
| EPI_ISL_445371                                                                                                                                 | HOSPITAL DR.SOTERO DEL RIO                                                      | Instituto de Salud Publica de Chile                                                | Andrés E Castillo, Bárbara Parra,Paz Tapia, Jaime Lagos, Loredana Arata, Alejandra Acevedo, Winston Andrade, Gabriel Leal, Carolina Tambley, Patricia Bustos, Rodrigo Fasce, Jorge Fernandez |
| EPI_ISL_445372                                                                                                                                 | HOSPITAL FF.AA. "CIRUJANO C. GUZMAN                                             | Instituto de Salud Publica de Chile                                                | Andrés E Castillo, Bárbara Parra,Paz Tapia, Jaime Lagos, Loredana Arata, Alejandra Acevedo, Winston Andrade, Gabriel Leal, Carolina Tambley, Patricia Bustos, Rodrigo Fasce, Jorge Fernandez |
| EPI_ISL_445373, EPI_ISL_445374, EPI_ISL_445375, EPI_ISL_445376, EPI_ISL_445377                                                                 | HOSPITAL SAN JUAN DE DIOS                                                       | Instituto de Salud Publica de Chile                                                | Andrés E Castillo, Bárbara Parra,Paz Tapia, Jaime Lagos, Loredana Arata, Alejandra Acevedo, Winston Andrade, Gabriel Leal, Carolina Tambley, Patricia Bustos, Rodrigo Fasce, Jorge Fernandez |
| EPI_ISL_445378                                                                                                                                 | HOSPITAL DE BULNES                                                              | Instituto de Salud Publica de Chile                                                | Andrés E Castillo, Bárbara Parra,Paz Tapia, Jaime Lagos, Loredana Arata, Alejandra Acevedo, Winston Andrade, Gabriel Leal, Carolina Tambley, Patricia Bustos, Rodrigo Fasce, Jorge Fernandez |
| EPI_ISL_445379                                                                                                                                 | IMALAB- HOSPITAL FACH                                                           | Instituto de Salud Publica de Chile                                                | Andrés E Castillo, Bárbara Parra,Paz Tapia, Jaime Lagos, Loredana Arata, Alejandra Acevedo, Winston Andrade, Gabriel Leal, Carolina Tambley, Patricia Bustos, Rodrigo Fasce, Jorge Fernandez |
| EPI_ISL_447119                                                                                                                                 | HOSPITAL DR.HERNAN HENRIQUEZ ARAVENA                                            | Instituto de Salud Publica de Chile                                                | Andrés E Castillo, Bárbara Parra,Paz Tapia, Jaime Lagos, Loredana Arata, Alejandra Acevedo, Winston Andrade, Gabriel Leal, Carolina Tambley, Patricia Bustos, Rodrigo Fasce, Jorge Fernandez |
| EPI_ISL_449800                                                                                                                                 | HOSPITAL SAN JUAN DE DIOS                                                       | Instituto de Salud Publica de Chile                                                | Andrés E Castillo, Bárbara Parra,Paz Tapia, Jaime Lagos, Loredana Arata, Alejandra Acevedo, Winston Andrade, Gabriel Leal, Carolina Tambley, Patricia Bustos, Rodrigo Fasce, Jorge Fernandez |
| EPI_ISL_459856, EPI_ISL_459857, EPI_ISL_459858, EPI_ISL_459859, EPI_ISL_459860, EPI_ISL_459861, EPI_ISL_459862, EPI_ISL_459863, EPI_ISL_459864 | Center for Genome Regulation (CRG)                                              | Center for Mathematical Modeling and Center for Genome Regulation. Santiago, Chile | Gaete A, Travisany D, Palma R, Urra C, Varas M, Allende ML, Maass A, González M.                                                                                                             |
| EPI_ISL_468747, EPI_ISL_468748, EPI_ISL_468749, EPI_ISL_468750, EPI_ISL_468751                                                                 | Facultad de Medicina UC                                                         | Center for Mathematical Modeling and Center for Genome Regulation. Santiago, Chile | Gaete A, Travisany D, Palma R, Urra C, Varas M, Allende ML, Maass A, González M, Ferres M.                                                                                                   |
| EPI_ISL_468752                                                                                                                                 | Center for Genome Regulation (CRG)                                              | Center for Mathematical Modeling and Center for Genome Regulation. Santiago, Chile | Gaete A, Travisany D, Palma R, Urra C, Varas M, Allende ML, Maass A, González M.                                                                                                             |
| EPI_ISL_468753, EPI_ISL_468754, EPI_ISL_468755, EPI_ISL_468756, EPI_ISL_468757, EPI_ISL_468758, EPI_ISL_468759                                 | Laboratorio de Biología Molecular, Facultad de Medicina, Universidad de Atacama | Center for Mathematical Modeling and Center for Genome Regulation. Santiago, Chile | Gaete A, Travisany D, Palma R, Urra C, Varas M, Allende ML, Maass A, González M, C Echeverria                                                                                                |
| EPI_ISL_468760                                                                                                                                 | Center for Genome Regulation (CRG)                                              | Center for Mathematical Modeling and Center for Genome Regulation. Santiago, Chile | Gaete A, Travisany D, Palma R, Urra C, Varas M, Allende ML, Maass A, González M.                                                                                                             |
